# Supplementary material
Source: PubMed Central journal article supplement (PMC7328016)

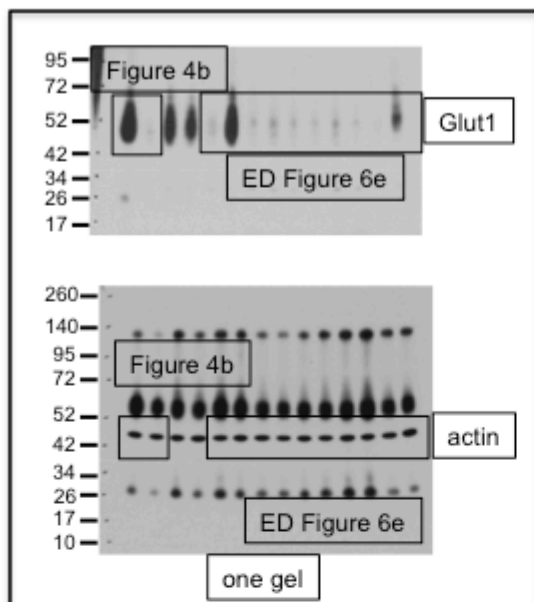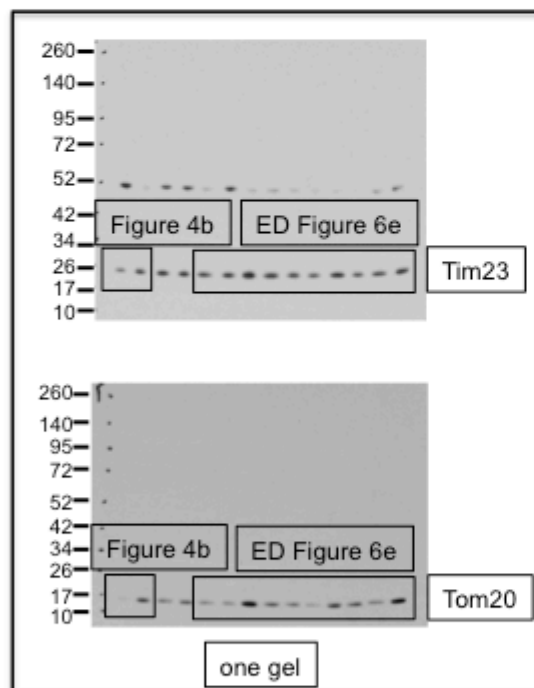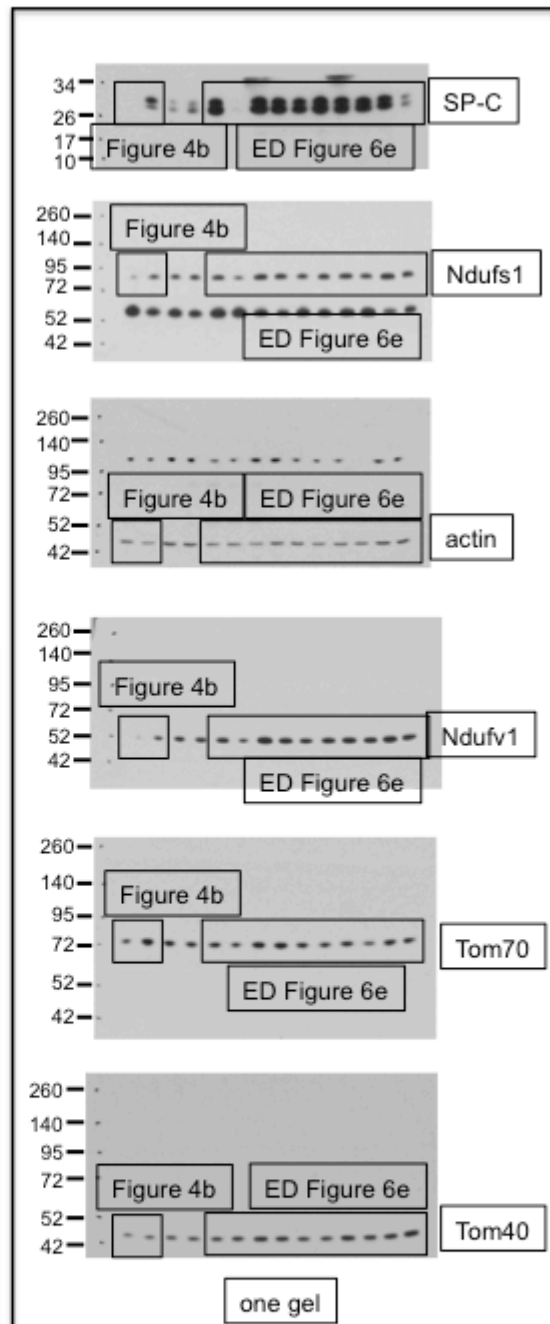

Samples were quantified and normalized prior to loading onto gels. Equal amount was loaded into each lane.  
 Please note: Bands shown in Figure 4b and Figure ED 6e are from the same gel.

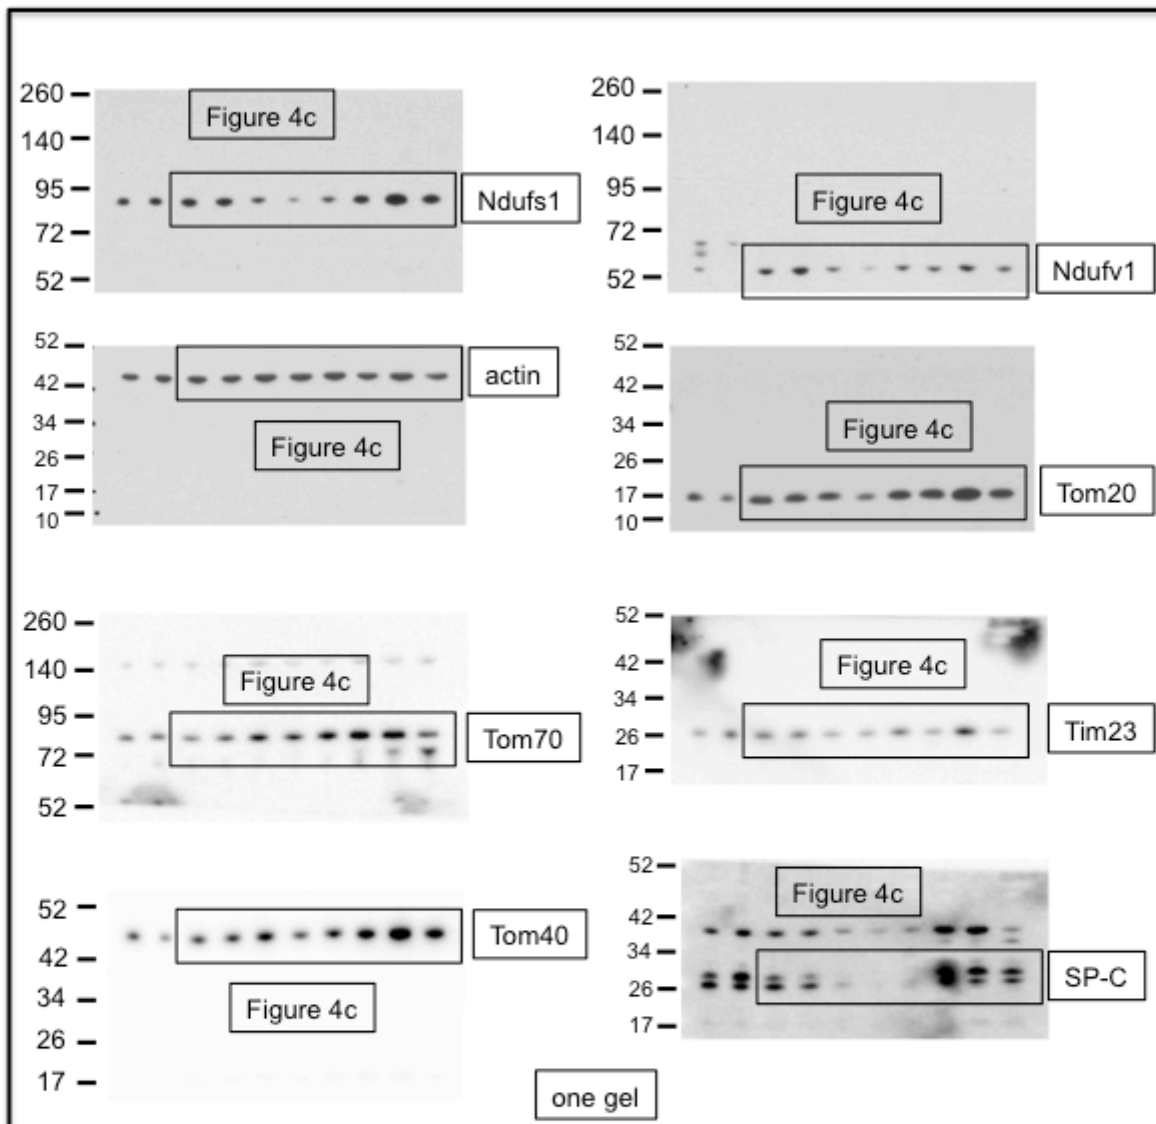

Samples were quantified and normalized prior to loading onto gels. Equal amount was loaded into each lane.

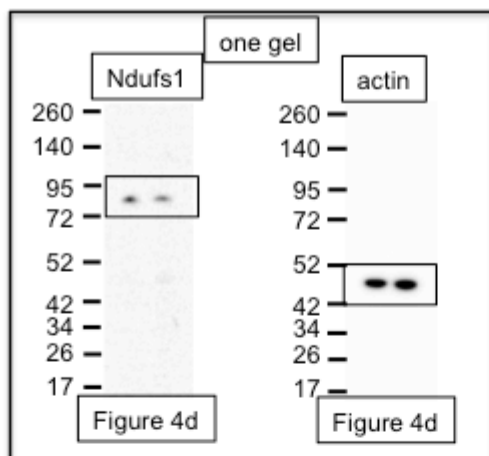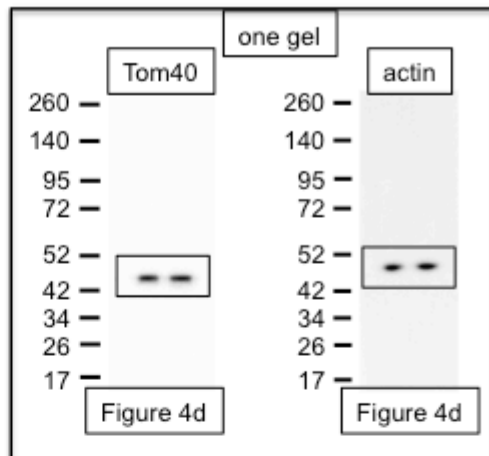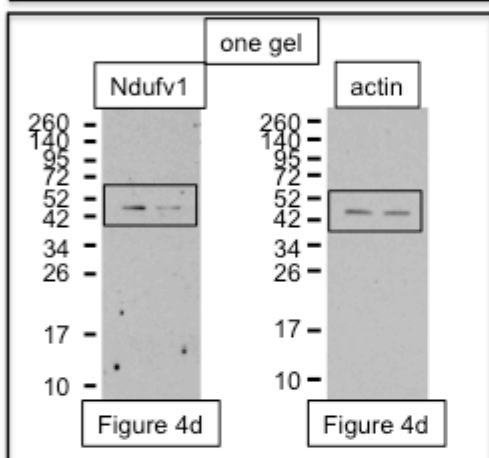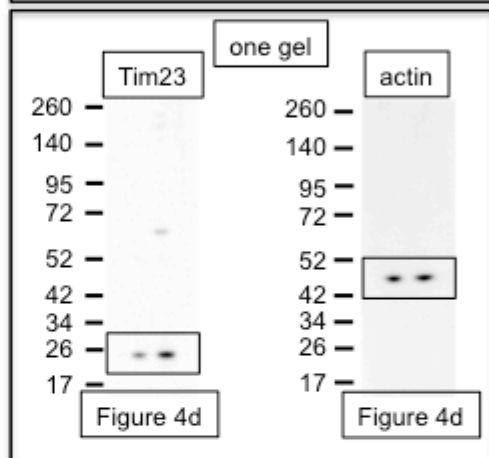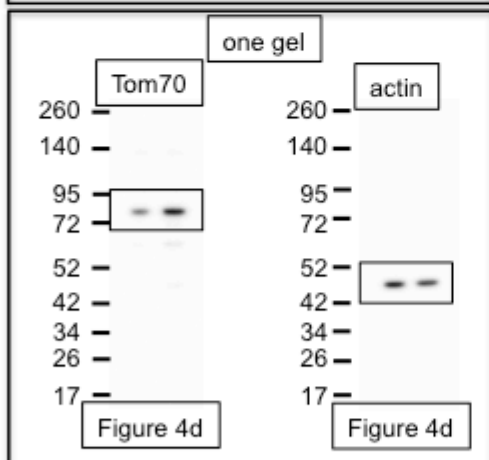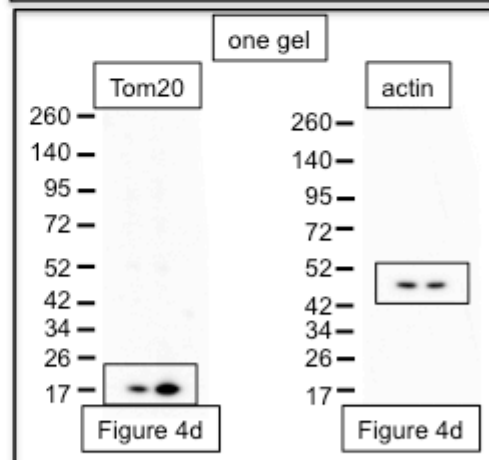

Figure 4h

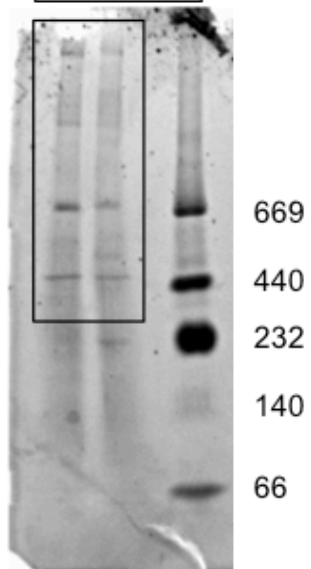

Supplement: NIHMS1064016-supplement-Supplemental_Material.pdf [file NIHMS1064016-supplement-Supplemental_Material.pdf]
